# Supplementary material
Source: PubMed Central journal article supplement (PMC6643490)
Supplement: ao8b02746_si_001.pdf [file ao8b02746_si_001.pdf]

## Supporting Information

### **Immobilizing Ultrafine PtNi Nanoparticles within Graphitic Carbon Nanosheets toward High-Performance Hydrogenation Reaction**

Linlin Xu,<sup>†</sup> Jingfei Zhang,<sup>‡</sup> Lin Xu,<sup>‡,\*</sup> and Jun Yang<sup>†,§,\*</sup>

<sup>†</sup>State Key Laboratory of Multiphase Complex Systems, Institute of Process Engineering, Chinese Academy of Sciences, Beijing 100190, China. Email: [jyang@ipe.ac.cn](mailto:jyang@ipe.ac.cn)

<sup>‡</sup>Jiangsu Key Laboratory of New Power Batteries, Jiangsu Collaborate Innovation Centre of Biomedical Functional Materials, School of Chemistry and Materials Science, Nanjing Normal University, Nanjing 210023, China. Email: [xulin001@njnu.edu.cn](mailto:xulin001@njnu.edu.cn)

<sup>§</sup>Center for Mesoscience, Institute of Process Engineering, Chinese Academy of Sciences, Beijing 100190, China

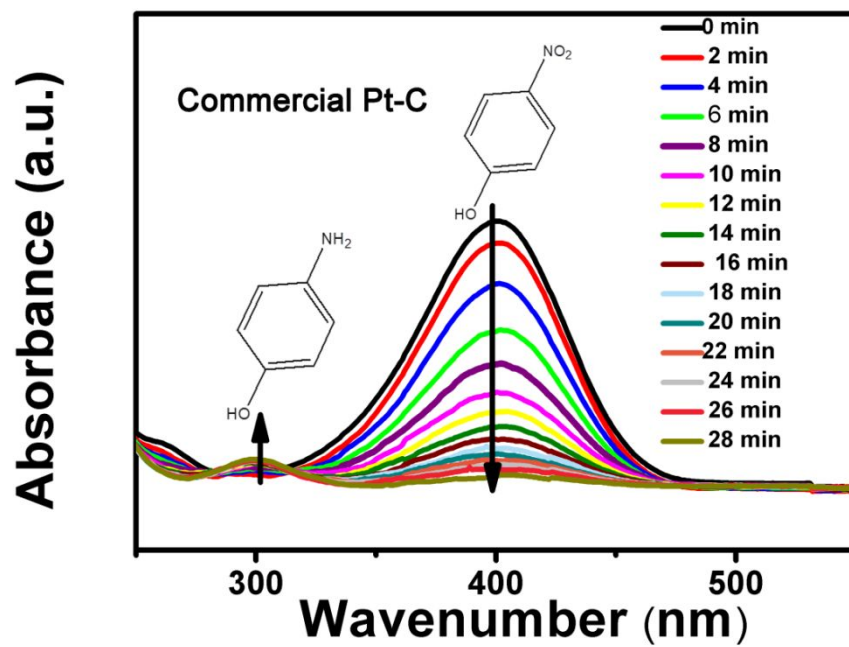

**Figure S1.** Time-dependent UV-vis spectra for the catalytic reduction of 4-nitrophenol by NaBH<sub>4</sub> in the presence of the commercial Pt/C (20 wt%) catalyst.
